# Supplementary material
Source: PubMed Central journal article supplement (PMC2776296)
Supplement: mmc1.pdf [file mmc1.pdf]

Biophysical Journal, Volume 97

**Supporting Material**

**A Second Look at Mini-Protein Stability: Analysis of FSD-1 using CD, DSC and Simulations**

Jianwen A. Feng, Jeff Kao, and Garland R. Marshall

# **A Second Look at Mini-Protein Stability: Analysis of FSD-1 using CD, DSC and Simulations**

## Supporting Material

Jianwen A. Feng\*, Jeff Kao<sup>†</sup>, and Garland R. Marshall\*<sup>‡</sup>

\*Center for Computational Biology

\*Department of Biochemistry and Molecular Biophysics

<sup>†</sup>Department of Chemistry

Washington University in St. Louis

660 S. Euclid Ave, St. Louis, MO 63110

<sup>‡</sup>Correspondence to: Garland R. Marshall; e-mail: [garland@biochem.wustl.edu](mailto:garland@biochem.wustl.edu)

E-mail addresses: [jafeng@artsci.wustl.edu](mailto:jafeng@artsci.wustl.edu) (JAF), [kao@wustl.edu](mailto:kao@wustl.edu) (JK)

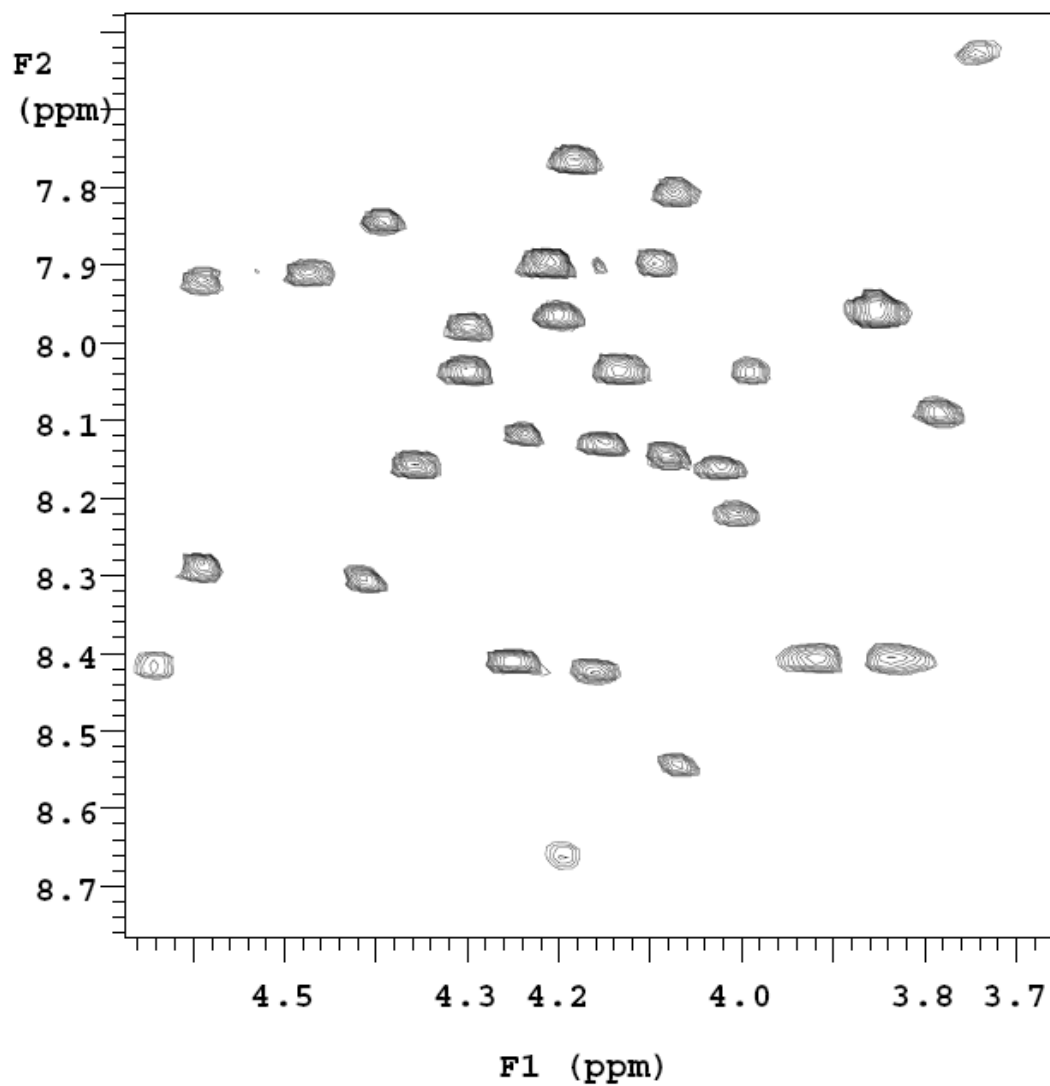

**Figure S1.** TOCSY  $H^{\alpha}$ -NH fingerprint NMR spectra of FSD-1 at 25 °C. The cross peaks correspond to 27 unique amino acids.

NMR spectra were recorded with a Varian Inova-600 (Varian Inc., Palo Alto, CA) spectrometer and the data were processed with VNMR software. NMR samples (~2mM) were prepared in H<sub>2</sub>O-D<sub>2</sub>O (90:10/v:v) with 50 mM sodium phosphate at pH 5.0 (uncorrected glass electrode). The spectra was collected at 25 °C. The total correlation (TOCSY) spectra were recorded using an MELV-17 mixing sequence of 80 ms flanked by two 2 ms trim pulses. Phase-sensitive 2D spectra were obtained by employing the hypercomplex method. A total of 2 x 256 x 2048 data matrixes with 16 scans per t1 increment were collected. Gaussian and sine-bell apodization functions were used in weighting the t2 and t1 dimensions, respectively. After two-dimensional Fourier transformation, the 2048 x 2048 frequency domain representation was phase and baseline corrected in both dimensions.
